# Supplementary material for: Application of a multifunctional liquid crystal material in colored PEDOT:PSS/Si heterojunction solar cells
Source: Royal Society of Chemistry journal article supplement (doi:10.1039/d5ma00007f), 2025-01-01
Supplement: d5ma00007f1.pdf [file d5ma00007f1.pdf]

## Application of a Multifunctional Liquid Crystal Material in Colorful PEDOT:PSS/Si Heterojunction Solar Cells

Zheng Zhou<sup>a,b,c</sup>, Shibo Chen<sup>d</sup>, Yingming Shen<sup>c</sup>, Juan Wang<sup>a,b</sup>, Guijun Zhang<sup>a,b</sup>, Yang Shi<sup>a,b</sup>, Haixia Wu<sup>a,b</sup>,  
Jingjing Luo<sup>a,b</sup>, Xiaohong Cheng<sup>d,\*</sup>, Yu Yang<sup>a,b,\*</sup>

<sup>a</sup> International Joint Research Center for Yunnan Optoelectronic Materials, School of Materials and Energy, Yunnan University, Kunming 650500, P. R. China.

<sup>b</sup> International Joint Research Center for Optoelectronic and Energy Materials, School of Materials and Energy, Yunnan University, Kunming 650500, P. R. China.

<sup>c</sup> Yunnan Provincial Academy of Science and Technology, Kunming 650100, P. R. China

<sup>d</sup> Key Laboratory of Medicinal Chemistry for Natural Resource, Ministry of Education, School of Chemical Science and Technology, Yunnan University, Kunming 650500, P. R. China.

\*:E-mail: [xhcheng@ynu.edu.cn](mailto:xhcheng@ynu.edu.cn), [yuyang@ynu.edu.cn](mailto:yuyang@ynu.edu.cn)

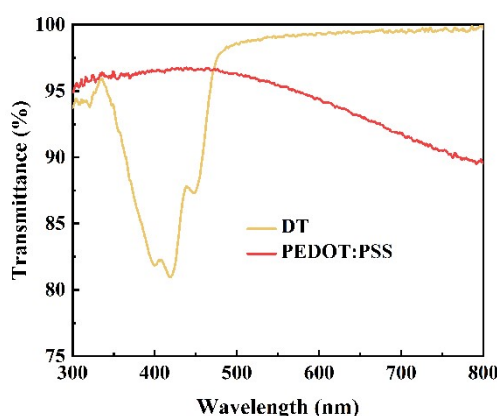

**Figure S1.** The transmittance spectra of DT film, and PEDOT:PSS film on glass.

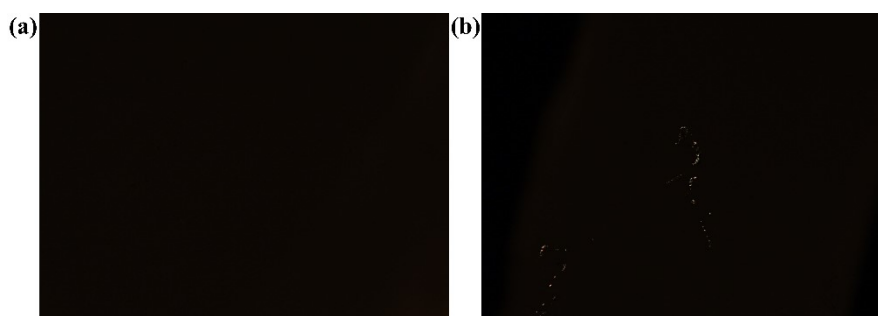

**Figure S2.** The images of PEDOT:PSS film (a) PEDOT:PSS+DT film (b) by polarizing optical microscopy.

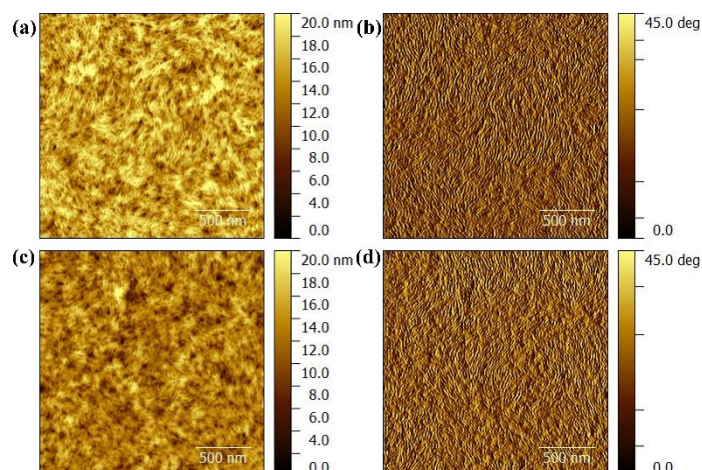

**Figure S3.** (a) AFM morphology and (b) phase images of PEDOT:PSS film. (c) AFM morphology and (d) phase images of PEDOT:PSS+DT film.

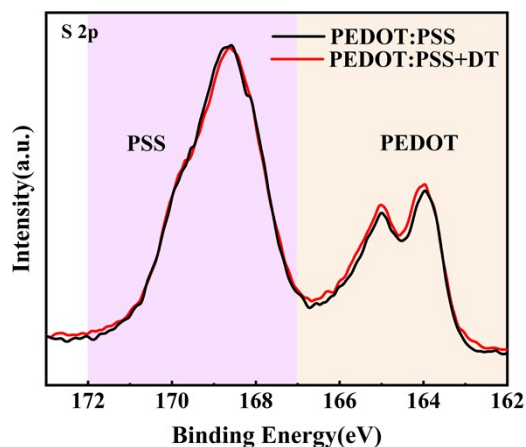

**Figure S4.** XPS spectra in the S 2p regions of PEDOT:PSS film and PEDOT:PSS+DT films.

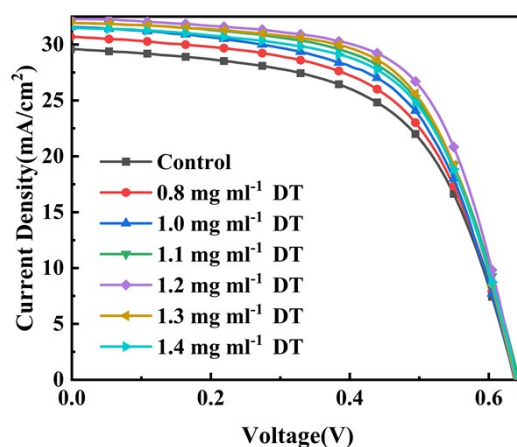

**Figure S5.** The light current J–V curves of devices with different concentrations of DT.

**Table S1**

Photovoltaic parameters of the champion devices with and with adding DT.

| Devices                 | $J_{SC}$ (mA cm <sup>-2</sup> ) | $V_{OC}$ (mV) | FF (%) | PCE (%) |
|-------------------------|---------------------------------|---------------|--------|---------|
| Control                 | 29.59                           | 0.638         | 58.45% | 11.03%  |
| 0.8 mg ml <sup>-1</sup> | 30.70                           | 0.639         | 58.84% | 11.56%  |
| 1.0 mg ml <sup>-1</sup> | 31.57                           | 0.637         | 59.88% | 12.05%  |
| 1.1 mg ml <sup>-1</sup> | 31.94                           | 0.643         | 61.38% | 12.61%  |
| 1.2 mg ml <sup>-1</sup> | 32.28                           | 0.640         | 64.11% | 13.24%  |
| 1.3 mg ml <sup>-1</sup> | 31.93                           | 0.638         | 62.85% | 12.81%  |
| 1.4 mg ml <sup>-1</sup> | 31.50                           | 0.641         | 61.55% | 12.42%  |

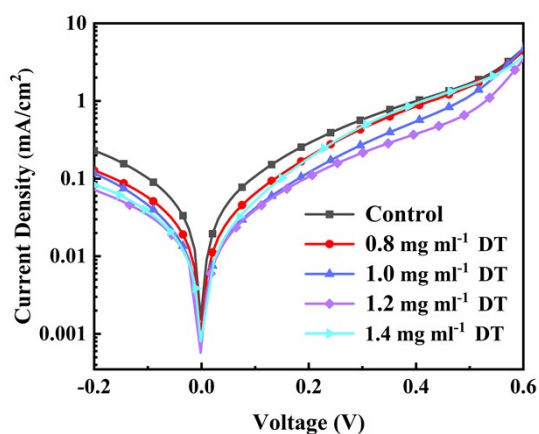

**Figure S6.** The dark J–V curves of devices with different concentrations of DT.

**Table S2**

The  $n$  and  $J_0$  properties of optimized control and DT-based device.

| Samples         | $n$  | $J_0$ (A cm <sup>-2</sup> ) |
|-----------------|------|-----------------------------|
| Control device  | 2.59 | $5.73 \times 10^{-4}$       |
| DT-added device | 1.87 | $8.04 \times 10^{-6}$       |

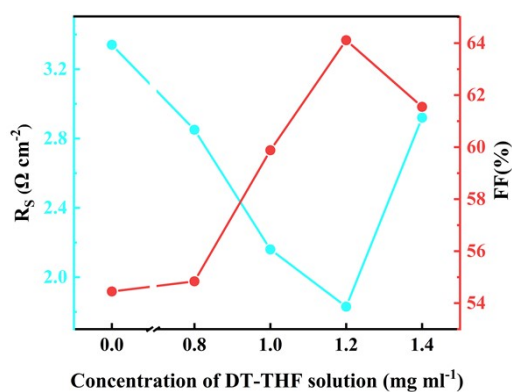

**Figure S7.** The R<sub>s</sub> and FF of devices with different DT concentrations.

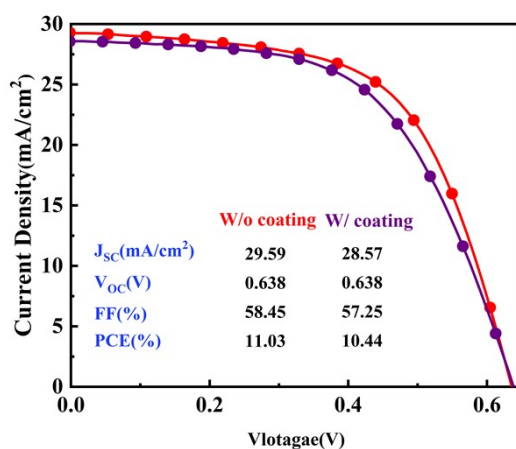

**Figure S8.** J–V curves of the devices with a configuration of Al/Si/PEDOT:PSS/Ag/DT (W/ coating) and Al/Si/PEDOT:PSS/Ag (W/o coating) .

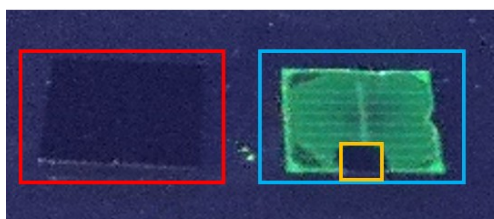

**Figure S9.** The image of devices without (red line) and with (cyan line) DT coating irradiated under UV lamp. The DT film covered on the square electrode of Ag-grids (yellow line) was erased with THF for testing performance of devices.
